# Supplementary material
Source: publisher figshare collection journal article supplement (https://frontiersin.figshare.com/ndownloader/files/25647404)
Supplement: Supplementary file 1 [file 25647404]

## Supplementary Table S2. Nutrient concentration (N, P, K, Ca, Mg, and S) in maize leaves as affected by intercropping systems, N management in the three growing seasons.

| Treatment | N | P | K | Ca | Mg | S |
| --- | --- | --- | --- | --- | --- | --- |
|  | g kg-1 | | | | | |
| Intercropping system (IC) |  |  |  |  |  |  |
| Monocropped maize | 30 a§ | 2.3 b | 17.3 b | 5.0 a | 3.2 a | 2.1 b |
| Maize + palisadegrass | 29 a | 2.9 a | 19.9 a | 5.0 a | 3.3 a | 2.3 a |
| Maize + guineagrass | 27 b | 2.4 b | 17.6 b | 4.7 a | 3.0 a | 2.0 b |
| N management (NM)‡ |  |  |  |  |  |  |
| 0-0 | 21 b | 2.2 b | 18.1 a | 4.9 a | 3.1 a | 1.7 b |
| 100-0 | 30 a | 2.6 a | 18.2 a | 4.9 a | 3.2 a | 2.2 a |
| 70-30 | 30 a | 2.6 a | 18.1 a | 5.0 a | 3.2 a | 2.2 a |
| 50-50 | 31 a | 2.6 a | 18.6 a | 4.9 a | 3.1 a | 2.1 a |
| 30-70 | 30 a | 2.7 a | 18.2 a | 4.9 a | 3.2 a | 2.2 a |
| 0-100 | 32 a | 2.5 a | 18.2 a | 4.8 a | 3.2 a | 2.2 a |
| F *probability* |  |  |  |  |  |  |
| IC | <0.001 | <0.001 | <0.001 | 0.230 | 0.091 | <0.001 |
| NM | <0.001 | <0.001 | 0.111 | 0.701 | 0.198 | <0.001 |
| IC x NM | 0.115 | 0.091 | 0.112 | 0.304 | 0.541 | 0.651 |

§Values followed by the same letter are not significantly different at *P ≤ 0.05* (LSD test). Average of three growing seasons (*n* =12).

‡A rate of 100 kg N ha-1 applied in two-split management at maize seeding and V5growth stage sidedressing.
